# Supplementary material for: Salmonella typhimurium induces intestinal inflammatory response through activation of Cav- 1/Akt/IKKα/NF-κB signaling pathway
Source: Research Square preprint supplement (doi:10.21203/rs.3.rs-2194918/v1), 2022-10-27
Supplement: Supplementary file 1 [file 323248b89dd6e60c3743b522.xlsx]

## Sheet: Figure 1
2020.01.10	0h								2020.01.11	24h									2020.01.12	48h							2020.01.13	72h							2020.01.14	96h							2020.01.15	120h
High-dose	20.6	24.1	24.7	25.4	26	22			High-dose	22.5	25	24.5	28.4	23.8	22.7				High-dose	24.7	23.6	24.1	23.9	23.8	24.6		High-dose	26.7	25.2	24.1	24.6	23.4	25		High-dose	23.8	26.1	25.3	25.7	23.9	24.8		High-dose	26.2	28.1	25.1	25.6	25.8	27.1
	24.4	23.4	23	26.6	23.3	23.5				24.9	22.8	23.3	22.9	24	24.9					23.6	21.7	22.3	24.5	22.9	21.2			25.5	23.6	24.2	22.5	24.4	23.9			26.5	24.4	27.9	24.8	29.4	24.4		Middle-dose	26.2	24.8	25.5	28.9	27.6	27.8
	21.2	24.4	23.7	24.3	26.4	21.5				25	26.4	24.7	27.1	22.8	24					23.9	24.5	22.6	23.3	23.7	22			24.4	23.2	26.1	25.5	23.9	24.8		Middle-dose	26.3	26.6	27.1	25.2	25.7	24.6		Low-dose	26.4	27.4	27.9	25.4	26.5	26.8
	24.3	23.9	22.2	22.5	21.8	23				24.5	22.8	22.9	27	24.3	23.9					23.8	25.7	21.2	25.2	24.3	23.7		Middle-dose	24.2	26.4	23.5	26	25.1	24.7			24.3	27.7	26.2	24.8	25.1	25.9		Control	29.7	23.6	28.2	26.4	27.2	26.6
Middle-dose	23.3	25.4	24.9	23.8	22.6	21.5			Middle-dose	22.8	25.5	23.3	25.3	23.5	22.1				Middle-dose	25.8	22.9	24.8	23.9	25.8	24.4			22.2	27	24.4	25	23.1	26.1		Low-dose	25.5	26.7	27.1	25.6	26.9	25.8
	24.2	23.1	23.2	22	23.2	21.9				23.9	24.7	23.3	24.4	24.9	23.7					26.3	21.4	25.4	24.5	25.2	26.7			24	26.8	25.2	22.4	25.7	23.9			26.7	26.6	25.2	24.8	25.6	25.9
	23.6	24.8	23.6	21.5	23.4	22.2				25.2	23.8	21.6	24.3	24	24.4					27.1	24.6	24.8	25.8	24.5	23.8		Low-dose	27.5	26.3	24.5	24.8	27.5	24.1		Control	23.9	24.1	25.6	29.4	24.6	24.9
	22.7	23	22.5	24.1	24.4	23.3				24.8	25.8	26.1	23.6	23.1	25.9					26	26.1	24.4	24.5	26.3	23.1			24.9	23.1	25.2	22.3	26	24.8			27.2	26.3	28.1	29	27.4	28.2
Low-dose	23.7	23.5	22.6	21.1	20.3	23.3			Low-dose	26	24.9	22.4	23.9	24.9	24.8				Low-dose	26.9	27	25.1	26.3	23.2	23.8			25.1	24.3	23.1	25.4	23.9	26.6
	23.3	21.2	24.8	23.6	20.9	25.6				24	22.1	23.8	23.2	25.8	22.1					23.4	25.1	25	25.8	24.8	24.5		Control	24.5	26.3	24.9	27.6	23.9	25.7
	22.8	24.2	22.5	25	23.2	24.5				24	24.7	24.4	24.7	25.3	24.8					23.5	25.9	26.3	25.3	24.1	24.4			25.3	25.7	26.2	26.7	25.8	26.9
	22.8	23	24.6	25.2	22.3	24.9				25.2	25.3	22.9	22.5	23.7	24.2					25.2	26.1	24.2	24.3	23.3	26.5			26.1	28.7	26.8	23.5	27.1	25.9
Control	22	24.7	22.9	24.2	24.6	23.9			Control	25.3	23.7	23.1	22.4	25.7	23.4				Control	25.4	23.9	24.2	25	25.7	24.3
	23.9	22.6	22.1	22.4	23.8	23.6				23.9	24.9	24.5	24.6	24.4	21.9					23.6	26	23.7	24.4	24.2	26.1
	23.2	23.1	22.4	24.4	23.4	24.5				24.2	26	23.9	23.8	25.6	25.4					28	26.1	25.3	25.5	27.1	25.4
	23.5	22.7	23	22.5	23.2	22.2				23.8	26.7	26.3	25.3	24.6	24.4					24.4	24.6	25	25.2	24.6	25.9
CRP (ng/L)	Control						Low-dose						Middle-dose						High-dose
24 h	1.33	2.48	1.6	1.36	1.73	1.69	2.56	2.1	2.11	1.81	2.25	2.19	1.86	2.75	1.64	2.55	1.94	2.17	2.44	2.6	3.07	2.85	2	2.78
48 h	1.33	2.05	2.62	1.41	1.65	1.83	4.22	5.17	4.19	4.2	5.11	4.56	4.6	5.9	6.2	7.56	4.4	5.74	8.15	8.65	4.98	5.17	5.26	6.61
72 h	2.01	1.95	1.99	2.32	2.06	2.04	3.61	4.38	3.6	4.46	4.52	4.08	4.94	5.14	5.06	5.78	6.48	5.56	6.97	6.14	6.35	7.83	4.54	6.02
96 h	2.02	2.32	1.48	1.61	1.34	1.78	2.8	2.73	2.93	3.41	2.63	2.92	4.66	5.6	3.62	4.05	5.65	4.73	4.24	6.02	5.67	4.01	3.61	4.64
120 h	1.59	1.99	1.56	1.43	1.86	1.65	2.81	2.89	1.87	2.35	3.81	2.77	4.54	3.62	2.7	5.01	3.78	3.94	3.04	5.65	4.31	3.81	4.67	4.27
TNF-a (ng/L)	Control						Low-dose						Middle-dose						High-dose
24 h	22.8	32.6	21.5	38.2	23.8	28.3	31.6	22.5	28.3	37.5	45.8	30.1	53.7	42.5	48.2	29.5	41.6	45.2	63.9	50.5	42.6	58.2	55.7	51.3
48 h	23.3	24.2	21.07	38.6	24.5	37.5	41.1	52.3	27.8	48.8	59.5	39.1	96.7	76.5	86.8	53.1	74.9	81.4	140.6	111.1	93.7	128.1	122.5	112.8
72 h	22.1	33.3	22.1	37.1	25.2	27.5	26.2	38.5	24.1	43.9	27.6	32.5	27.4	42.4	26.9	48.1	40.1	31.1	42.2	60.3	39.8	70.7	44.2	52.4
96 h	23.3	33.2	21.9	38.9	24.3	28.9	24.2	34.6	23.2	41.3	25.9	30.2	25.1	36.8	24.7	44.3	26.7	31.2	27.4	39.8	27.5	48.1	28.6	33.9
120 h	23.8	25.4	21.5	39.1	25.1	39.4	22.8	23.5	20.6	38.2	24.2	36.8	25.6	26.1	23.2	40.5	26.9	42	26.8	23.2	24.2	35.9	28.2	34.5
E-selectin (ng/L)	Control						Low-dose						Middle-dose						High-dose
24 h	1.06	1.46	1.83	1.29	1.25	1.39	3.18	3.58	3.95	3.41	3.37	3.37	6.11	6.71	7.08	6.54	6.5	6.43	7.69	6.09	5.46	6.92	7.88	6.83
48 h	1.09	1.5	1.88	1.33	1.28	1.43	1.21	1.62	2	1.45	1.4	1.35	1.25	1.72	2.16	1.53	1.47	1.61	1.4	1.87	2.31	1.68	1.62	1.79
72 h	1.07	1.48	1.86	1.31	1.26	1.41	1.13	1.54	1.92	1.37	1.12	1.42	1.06	1.53	1.77	1.34	1.18	1.39	1.1	1.77	1.61	1.38	1.32	1.42
96 h	1.1	1.51	1.89	1.34	1.29	1.43	1.18	1.8	1.74	1.41	1.35	1.48	1.09	1.56	1.92	1.37	1.35	1.47	1.26	1.47	1.95	1.4	1.15	1.41
120 h	1.05	1.47	1.84	1.49	1.24	1.44	1.11	1.53	1.9	1.35	1.12	1.4	1.33	1.51	1.85	1.05	1.16	1.37	1.09	1.75	1.69	1.38	1.3	1.42
IL-8 (ng/L)	Control						Low-dose						Middle-dose						High-dose
24 h	31.06	32.89	30.99	34.49	30.84	32.07	50.72	65.18	63.41	57.88	54.82	58.25	69.58	66.57	64.17	62.04	57.04	63.34	69.65	64.55	65.08	59.12	58.56	63.38
48 h	32.9	31.7	32.39	32.35	31.33	32.15	89.11	93.55	90.91	87.84	89.96	90.33	91.53	99.78	97.35	92.55	96.38	95.54	101.56	108.25	104.3	112.72	109.37	107.26
72 h	33.8	32.51	34.53	34.43	33.3	33.76	68.88	74.3	70.08	72.84	66.32	70.43	79.27	79.29	82.7	76.7	80.73	79.34	97.8	94.73	95.39	92.41	94.63	94.87
96 h	31.8	30.6	33.16	32.8	34.46	32.58	52.94	45.4	52.96	53.88	52.78	52.09	50.69	60.89	55.49	57.91	61.34	57.35	65.52	69.11	69.52	67.82	63.66	67.34
120 h	33.11	33.9	33.2	32.99	33.68	33.49	47.75	41.35	31.99	49.39	30	40.12	46.05	47.23	45.03	45.37	44.35	45.57	54.17	55.91	55.39	59.36	59.46	56.35
MCP-1 (ng/L)	Control						Low-dose						Middle-dose						High-dose
24 h	30.78	46.01	27.03	51.57	32.13	38.22	42.66	30.38	36.25	50.65	63.83	40.64	72.5	55.4	67.07	39.8	56.16	61.02	86.27	68.18	57.51	80.57	75.2	67.26
48 h	31.46	32.67	30.45	50.11	33.08	50.6	55.49	70.61	39.53	65.88	78.34	52.78	126.55	103.28	117.18	75.68	101.12	109.89	104.81	149.98	131.5	112.94	165.38	152.28
72 h	31.84	44.96	29.85	52.08	34.02	37.13	35.37	53.97	32.54	59.26	37.26	41.87	36.99	57.24	38.32	62.94	54.14	41.98	56.97	71.41	58.73	40.45	59.67	70.74
96 h	31.45	46.82	29.56	52.52	32.81	37.02	32.67	46.71	31.32	53.76	36.96	40.77	33.89	46.68	36.35	59.81	36.05	42.12	36.99	53.73	37.13	60.94	42.61	45.77
120 h	32.13	36.29	29.03	50.79	33.89	53.19	30.78	31.73	27.81	51.57	34.67	47.68	34.56	35.24	31.32	45.68	40.32	26.7	36.18	29.32	32.67	50.47	38.07	46.58
sICAM-1 (ng/L)	Control						Low-dose						Middle-dose						High-dose
24 h	11.35	11.72	13.55	11.55	11.63	11.92	15.46	17.84	18.7	21.77	17.63	18.36	20.37	24.19	24.64	20.8	24.09	22.79	27.06	24.26	22.83	25.77	26.25	25.44
48 h	11.91	12.4	15.32	11.15	13.21	12.73	14.83	15.29	11.95	11.86	12.75	13.35	15.85	17.62	13.65	15.03	14.38	15.32	18.41	16.74	14.97	15.25	13.8	15.87
72 h	13.47	11.84	13.67	11.67	9.75	12.08	11.52	11.89	15.68	9.72	11.8	12.24	11.5	10.87	13.7	12.89	12.35	12.28	11.41	8.45	13.59	11.06	14.58	11.83
96 h	11.44	12.81	13.64	11.64	10.7	12.03	11.31	11.68	13.51	11.51	11.59	11.97	11.46	14.84	13.66	11.66	8.74	12.09	11.27	10.64	13.47	12.32	11.55	11.85
120 h	11.53	8.9	13.73	14.73	11.81	12.17	11.6	10.97	13.8	11.8	12.88	12.23	11.68	12.05	13.88	12.95	10.96	12.31	11.46	11.83	13.66	12.54	10.89	12.08

## Sheet: Figure 2
qPCR (48 h jejunum)
	Control						ST
NF-κB	1.086	1.043	0.986	1.001	1.094	0.914	2.888	2.657	2.868	2.812	2.863	2.673
Cav-1	1.094	1.083	0.945	1.021	1.064	0.927	1.257	1.214	1.347	1.389	1.257	1.245
Akt	1.015	0.896	1.096	1.079	0.889	1.035	2.099	2.428	2.056	2.045	2.437	2.105
IKKα	0.956	1.035	1.017	1.141	1	0.883	0.241	0.259	0.325	0.276	0.236	0.318
Western blot (jejunum)
	Control			ST
NF-кB p65	1	1	1	3.34561	3.33368	3.36443
Cav-1	1	1	1	1.8613	1.89825	1.93909
Akt	1	1	1	1.34529	1.3447	1.35848
IKKα	1	1	1	0.125675	0.12433	0.126718
		Control	ST				Control	ST				Control	ST				Control	ST
NF-кB p65 1		199982	669833		Cav-1 1		534391	995810		Akt 1		986865	1329156		IKKα 1		846657	106526
NF-кB p65 2		198799	668965		Cav-1 2		522090	1000379		Akt 2		988399	1341603		IKKα 2		851046	106806
NF-кB p65 3		200746	671258		Cav-1 3		519080	1000379		Akt 3		993464	1341333		IKKα 3		828230	104309
GAPDH 1		1173323	1174677		GAPDH 1		1173323	1174677		GAPDH 1		1173323	1174677		GAPDH 1		1173323	1174677
GAPDH 2		1156352	1167227		GAPDH 2		1156352	1167227		GAPDH 2		1156352	1167227		GAPDH 2		1156352	1167227
GAPDH 3		1186147	1178881		GAPDH 3		1186147	1178881		GAPDH 3		1186147	1178881		GAPDH 3		1186147	1178881
NF-кB p65 1/GAPDH 1		0.170441	0.570227		Cav-1 1/GAPDH 1		0.455451	0.847731		Akt 1/GAPDH 1		0.841086	1.13151		IKKα 1/ GAPDH 1		0.721589	0.0906854
NF-кB p65 2/GAPDH2		0.171919	0.573123		Cav-1 2/GAPDH 2		0.451497	0.857056		Akt 2/GAPDH 2		0.854756	1.14939		IKKα 2 /GAPDH 2		0.735975	0.0915041
NF-кB p65 3/GAPDH 3		0.169242	0.569403		Cav-1 3/GAPDH 3		0.437619	0.848584		Akt 3/GAPDH3		0.837556	1.1378		IKKα 3 /GAPDH 3		0.698252	0.0884814
		1	3.34561				1	1.8613				1	1.34529				1	0.125675
		1	3.33368				1	1.89825				1	1.3447				1	0.12433
		1	3.36443				1	1.93909				1	1.35848				1	0.126718

## Sheet: Figure 4
LDH (U/L)	3 h			6 h			12 h			18 h
Control	2.75	2.88	3.08	2.75	3.05	2.61	2.96	3.12	2.61	2.95	2.55	3.22
1X102 CFU/mL	3.18	3.25	2.92	3.79	3.48	3.52	8.03	7.58	7.21	10.25	10.66	9.38
1X103 CFU/mL	3.36	3.05	3.19	4.31	4.42	3.89	9.13	8.73	9.75	12.82	14.05	13.62
1X104 CFU/mL	3.07	3.52	3.34	7.06	7.45	7.72	13.95	12.66	13.63	19.13	18.48	17.92
CRP (ng/L)	3 h			6 h			12 h			18 h
Control	0.82	0.75	0.98	0.87	1.08	0.71	0.72	0.94	0.84	0.91	0.99	0.69
1X103 CFU/mL	1.25	1.01	0.82	1.46	1.28	1.05	1.48	1.65	1.13	1.71	1.45	1.62
TNF-a （ng/L)	3 h			6 h			12 h			18 h
Control	41.35	35.68	37.58	44.65	33.78	38.86	40.53	33.05	46.65	48.32	38.71	35.46
1X103 CFU/mL	48.48	40.92	46.23	72.14	86.35	78.18	125.83	115.29	89.52	191.35	152.38	167.17
IL-8 (ng/L)	3 h			6 h			12 h			18 h
Control	38.34	33.26	34.1	38.45	33.86	36.08	41.63	34.72	39.16	45.26	38.05	33.06
1X103 CFU/mL	40.76	32.35	35.52	55.32	46.05	49.26	86.36	89.35	77.21	170.68	135.69	156.3
MCP-1 (ng/L)	3 h			6 h			12 h			18 h
Control	18.68	21.35	17.56	23.46	19.18	21.83	20.35	22.19	18.06	19.21	20.82	18.46
1X103 CFU/mL	25.34	28.22	22.36	40.38	35.78	38.47	26.02	30.45	32.33	20.56	25.45	21.82
Western blot (Cell)
	Control			ST
NF-кB p65	1	1	1	2.77314	2.83875	2.79043
Cav-1	1	1	1	1.27243	1.30302	1.27081
Akt	1	1	1	1.82278	2.06524	2.01361
IKKα	1	1	1	0.503859	0.527912	0.593451
		Control	ST				Control	ST				Control	ST				Control	ST
NF-кB p65 1		265636	768570		Cav-1 1		559839	743229		Akt 1		737657	1402857		IKKα 1		1011947	531975
NF-кB p65 2		269157	779211		Cav-1 2		570729	758406		Akt 2		745196	1569504		IKKα 2		988234	532039
NF-кB p65 3		269750	783562		Cav-1 3		572114	756841		Akt 3		755993	1584652		IKKα 3		1105695	683064
GAPDH 1		1372069	1431529		GAPDH 1		1372069	1431529		GAPDH 1		1372069	1431529		GAPDH 1		1372069	1431529
GAPDH 2		1405590	1433443		GAPDH 2		1405590	1433443		GAPDH 2		1405590	1433443		GAPDH 2		1405590	1433443
GAPDH 3		1382035	1438666		GAPDH 3		1382035	1438666		GAPDH 3		1382035	1438666		GAPDH 3		1382035	1438666
NF-кB p65 1/GAPDH 1		0.193603	0.536887		Cav-1 1/GAPDH 1		0.408025	0.519185		Akt 1/GAPDH 1		0.537624	0.979971		IKKα 1/ GAPDH 1		0.737534	0.371613
NF-кB p65 2/GAPDH2		0.19149	0.543594		Cav-1 2/GAPDH 2		0.406042	0.52908		Akt 2/GAPDH 2		0.530166	1.09492		IKKα 2 /GAPDH 2		0.703074	0.371162
NF-кB p65 3/GAPDH 3		0.195183	0.544645		Cav-1 3/GAPDH 3		0.413965	0.526071		Akt 3/GAPDH3		0.547014	1.10147		IKKα 3 /GAPDH 3		0.800048	0.47479
		1	2.77314				1	1.27243				1	1.82278				1	0.503859
		1	2.83875				1	1.30302				1	2.06524				1	0.527912
		1	2.79043				1	1.27081				1	2.01361				1	0.593451

## Sheet: Figure 5
LDH (U/L)	12 h				CRP (ng/L)	12 h				TNF-a (ng/L)	12 h				IL-8 (ng/L)	12 h				MCP-1 (ng/L)	12 h
Control	2.98	3.15	2.68		Control	0.74	0.95	0.82		Control	40.26	33.25	46.38		Control	40.25	43.36	33.82		Control	17.72	21.07	22.46
β-CD	3.35	2.68	2.89		β-CD	0.98	0.89	0.71		β-CD	45.62	36.85	41.5		β-CD	38.85	32.07	45.36		β-CD	20.58	18.32	22.88
ST	9.21	8.72	9.72		ST	1.42	1.55	1.18		ST	115.3	125.45	90.75		ST	85.62	88.38	79.25		ST	26.95	32.46	30.87
ST+ β-CD	5.35	4.68	6.02		ST+ β-CD	0.92	1.28	1.06		ST+ β-CD	68.26	61.55	80.38		ST+ β-CD	57.36	46.25	65.92		ST+ β-CD	23.68	24.45	25.82
Western blot
	Control			β-CD			ST			ST+β-CD
NF-кB p65	1	1	1	0.596246	0.587931	0.594855	1.57727	1.53273	1.51012	1.13014	1.09978	1.09718
Cav-1	1	1	1	0.734234	0.734527	0.730208	1.04773	1.04784	1.03602	0.909893	0.91275	0.920567
Akt	1	1	1	0.727194	0.728522	0.731868	1.16405	1.16191	1.15199	0.978239	0.988857	0.96652
IKKα	1	1	1	0.691936	0.69642	0.74005	0.567826	0.559059	0.563569	0.58028	0.576361	0.580613
		Control	β-CD	ST	ST+β-CD				Control	β-CD	ST	ST+β-CD				Control	β-CD	ST	ST+β-CD				Control	β-CD	ST	ST+β-CD
NF-кB p65 1		604322	386698	963453	752407		Cav-1 1		687352	541616	727921	689004		Akt 1		685773	535191	806876	739056		IKKα 1		1149577	853654	659796	734899
NF-кB p65 2		621204	392002	965215	753350		Cav-1 2		683863	539144	726424	688299		Akt 2		684272	535056	805982	746137		IKKα 2		1158311	865814	656460	736167
NF-кB p65 3		623120	396429	953031	756694		Cav-1 3		693268	541415	727430	706365		Akt 3		678865	531372	792052	726218		IKKα 3		1144077	905522	653019	735216
GAPDH 1		1149458	1233591	1161848	1266325		GAPDH 1		1149458	1233591	1161848	1266325		GAPDH 1		1149458	1233591	1161848	1266325		GAPDH 1		1149458	1233591	1161848	1266325
GAPDH 2		1147538	1231672	1163302	1265387		GAPDH 2		1147538	1231672	1163302	1265387		GAPDH 2		1147538	1231672	1163302	1265387		GAPDH 2		1147538	1231672	1163302	1265387
GAPDH 3		1127228	1205575	1141655	1247626		GAPDH 3		1127228	1205575	1141655	1247626		GAPDH 3		1127228	1205575	1141655	1247626		GAPDH 3		1127228	1205575	1141655	1247626
NF-кB p65 1/GAPDH 1		0.525745	0.313473	0.829242	0.594166		Cav-1 1/GAPDH 1		0.597979	0.439056	0.62652	0.544097		Akt 1/GAPDH 1		0.596606	0.433848	0.694476	0.583623		IKKα 1/ GAPDH 1		1.0001	0.692007	0.567885	0.58034
NF-кB p65 2/GAPDH2		0.541336	0.318268	0.82972	0.595351		Cav-1 2/GAPDH 2		0.595939	0.437733	0.62445	0.543943		Akt 2/GAPDH 2		0.596296	0.434414	0.69284	0.589651		IKKα 2 /GAPDH 2		1.00939	0.702958	0.564307	0.581772
NF-кB p65 3/GAPDH 3		0.55279	0.32883	0.83478	0.606507		Cav-1 3/GAPDH 3		0.61502	0.449093	0.637171	0.566167		Akt 3/GAPDH3		0.602243	0.440762	0.693775	0.58208		IKKα 3 /GAPDH 3		1.01495	0.751112	0.571993	0.589292
		1	0.596246	1.57727	1.13014				1	0.734234	1.04773	0.909893				1	0.727194	1.16405	0.978239				1	0.691936	0.567826	0.58028
		1	0.587931	1.53273	1.09978				1	0.734527	1.04784	0.91275				1	0.728522	1.16191	0.988857				1	0.69642	0.559059	0.576361
		1	0.594855	1.51012	1.09718				1	0.730208	1.03602	0.920567				1	0.731868	1.15199	0.96652				1	0.74005	0.563569	0.580613

## Sheet: Figure 6
LDH (U/L)	12 h				CRP (ng/L)	12 h				TNF-a （ng/L)	12 h				IL-8 (ng/L)	12 h				MCP-1 (ng/L)	12 h
Control	2.73	3.21	2.55		Control	0.98	0.85	0.7		Control	35.72	45.18	37.25		Control	34.53	39.86	42.76		Control	17.95	22.05	18.45
GSK2110183	3.26	2.79	2.35		GSK2110183	0.73	0.95	0.88		GSK2110183	34.23	44.89	40.36		GSK2110183	39.55	43.67	34.28		GSK2110183	17.46	21.35	19.86
ST	9.45	10.16	9.08		ST	1.33	1.45	1.52		ST	98.08	121.32	109.37		ST	79.65	90.23	86.56		ST	33.57	28.42	30.15
ST+GSK2110183	7.02	5.08	4.55		ST+GSK2110183	1.12	0.92	1.25		ST+GSK2110183	67.35	75.22	60.58		ST+GSK2110183	51.88	60.45	67.63		ST+GSK2110183	24.72	21.58	23.85
Western blot
	Control			GSK2110183			ST			ST+GSK2110183
NF-кB p65	1	1	1	0.537449	0.559721	0.550924	1.47379	1.38504	1.41124	1.33552	1.23744	1.26628
Akt	1	1	1	0.598462	0.598877	0.600096	1.10886	1.10147	1.10557	0.856203	0.864539	0.845556
IKKα	1	1	1	0.9154	0.858654	0.873994	0.486561	0.460555	0.464556	0.753035	0.716729	0.707432
		Control	GSK2110183	ST	ST+GSK2110183					Control	GSK2110183	ST	ST+GSK2110183				Control	GSK2110183	ST	ST+GSK2110183
NF-кB p65 1		671766	387466	1000716	988371			Akt 1		591218	379719	662646	557669		IKKα 1		929239	912886	457005	770894
NF-кB p65 2		729277	438119	1023953	995112			Akt 2		592805	381046	661928	565136		IKKα 2		1031059	950232	481383	814882
NF-кB p65 3		716818	422360	1024553	1004641			Akt 3		597507	383483	669042	559188		IKKα 3		1053526	984773	495686	824903
GAPDH 1		1149458	1233591	1161848	1266325			GAPDH 1		1149458	1233591	1161848	1266325		GAPDH 1		1149458	1233591	1161848	1266325
GAPDH 2		1147538	1231672	1163302	1265387			GAPDH 2		1147538	1231672	1163302	1265387		GAPDH 2		1147538	1231672	1163302	1265387
GAPDH 3		1127228	1205575	1141655	1247626			GAPDH 3		1127228	1205575	1141655	1247626		GAPDH 3		1127228	1205575	1141655	1247626
NF-кB p65 1/GAPDH 1		0.58442	0.314096	0.861314	0.780503			Akt 1/GAPDH 1		0.514345	0.307816	0.570338	0.440384		IKKα 1/ GAPDH 1		0.808415	0.740023	0.393343	0.608765
NF-кB p65 2/GAPDH2		0.635514	0.355711	0.880213	0.786409			Akt 2/GAPDH 2		0.516589	0.309373	0.569008	0.446611		IKKα 2 /GAPDH 2		0.898497	0.771498	0.413807	0.643978
NF-кB p65 3/GAPDH 3		0.635912	0.350339	0.897428	0.805242			Akt 3/GAPDH3		0.530068	0.318091	0.586028	0.448202		IKKα 3 /GAPDH 3		0.934617	0.816849	0.434182	0.661178
		1	0.537449	1.47379	1.33552					1	0.598462	1.10886	0.856203				1	0.9154	0.486561	0.753035
		1	0.559721	1.38504	1.23744					1	0.598877	1.10147	0.864539				1	0.858654	0.460555	0.716729
		1	0.550924	1.41124	1.26628					1	0.600096	1.10557	0.845556				1	0.873994	0.464556	0.707432

## Sheet: Figure 7
LDH (U/L)	12 h				CRP (ng/L)	12 h				TNF-a（ng/L)	12 h				IL-8 (ng/L)	12 h				MCP-1 (ng/L)	12 h
Control	2.47	3.51	2.89		Control	0.96	0.76	0.85		Control	47.44	37.51	39.12		Control	41.85	44.92	36.31		Control	22.06	20.42	18.98
BMS-345541	2.85	2.56	3.56		BMS-345541	0.87	0.96	0.75		BMS-345541	35.95	42.38	47.13		BMS-345541	36.03	45.87	41.43		BMS-345541	22.26	20.85	18.56
ST	8.95	9.39	10.02		ST	1.36	1.55	1.43		ST	106.98	114.84	123.39		ST	94.71	90.69	83.55		ST	34.25	30.83	31.84
ST+BMS-345541	5.96	5.42	5.06		ST+BMS-345541	1.26	1.06	1.12		ST+BMS-345541	59.37	73.72	66.05		ST+BMS-345541	53.68	55.65	62.24		ST+BMS-345541	26.23	25.82	22.76
LDH (U/L)	12 h				CRP	12 h				TNF-a （ng/L)	12 h				IL-8 (ng/L)	12 h				MCP-1 (ng/L)	12 h
Control	2.95	3.58	2.52		Control	0.83	0.74	0.94		Control	46.49	36.88	38.35		Control	44.23	35.16	41.08		Control	18.6	20.21	21.65
BAY11-7082	2.61	3.63	2.91		BAY11-7082	0.96	0.85	0.72		BAY11-7082	41.55	46.28	35.33		BAY11-7082	40.6	44.95	35.3		BAY11-7082	20.43	21.82	18.05
ST	10.22	9.58	9.13		ST	1.52	1.4	1.31		ST	104.88	112.96	120.92		ST	92.37	82.26	88.85		ST	33.56	30.21	31.55
ST+BAY11-7082	5.75	5.56	6.44		ST+BAY11-7082	0.99	1.08	1.21		ST+BAY11-7082	59.96	74.6	66.71		ST+BAY11-7082	63.48	56.76	54.75		ST+BAY11-7082	25.32	22.78	25.9
Western blot
	Control			BMS-345541			ST			ST+BMS-345541
NF-кB p65	1	1	1	0.677237	0.667859	0.661551	1.24484	1.23066	1.23119	1.13541	1.12417	1.11443
IKKα	1	1	1	0.677075	0.683084	0.665724	0.344539	0.356255	0.353411	0.707106	0.708996	0.684711
		Control	BMS-345541	ST	ST+BMS-345541					Control	BMS-345541	ST	ST+BMS-345541
NF-кB p65 1		711550	517159	895316	890041			IKKα 1		1049871	762870	365620	817848
NF-кB p65 2		717218	514119	894775	889075			IKKα 2		1040891	763145	375917	813777
NF-кB p65 3		713045	504502	889129	879517			IKKα 3		1079671	768720	386451	818222
GAPDH 1		1149458	1233591	1161848	1266325			GAPDH 1		1149458	1233591	1161848	1266325
GAPDH 2		1147538	1231672	1163302	1265387			GAPDH 2		1147538	1231672	1163302	1265387
GAPDH 3		1127228	1205575	1141655	1247626			GAPDH 3		1127228	1205575	1141655	1247626
NF-кB p65 1/GAPDH 1		0.619031	0.419231	0.770596	0.702854			IKKα 1/ GAPDH 1		0.913362	0.618414	0.314688	0.645844
NF-кB p65 2/GAPDH2		0.625006	0.417416	0.769168	0.702611			IKKα 2 /GAPDH 2		0.907065	0.619601	0.323147	0.643105
NF-кB p65 3/GAPDH 3		0.632565	0.418474	0.778807	0.704952			IKKα 3 /GAPDH 3		0.957811	0.637638	0.338501	0.655823
		1	0.677237	1.24484	1.13541					1	0.677075	0.344539	0.707106
		1	0.667859	1.23066	1.12417					1	0.683084	0.356255	0.708996
		1	0.661551	1.23119	1.11443					1	0.665724	0.353411	0.684711
	Control			BAY11-7082			ST			ST+BAY11-7082
NF-кB p65	1	1	1	0.448585	0.462163	0.453731	3.41929	3.43016	3.39804	1.80752	1.80822	1.80501
IKKα	1	1	1	0.465355	0.492648	0.48169	0.142771	0.149902	0.146283	0.770759	0.824167	0.800144
		Control	BAY11-7082	ST	ST+BAY11-7082					Control	BAY11-7082	ST	ST+BAY11-7082
NF-кB p65 1		240911	115979	832624	479724			IKKα 1		1085163	541948	156600	921437
NF-кB p65 2		244551	121309	850372	487615			IKKα 2		996076	526693	151365	905241
NF-кB p65 3		241984	117427	832795	483435			IKKα 3		1023061	527050	151572	906029
GAPDH 1		1149458	1233591	1161848	1266325			GAPDH 1		1149458	1233591	1161848	1266325
GAPDH 2		1147538	1231672	1163302	1265387			GAPDH 2		1147538	1231672	1163302	1265387
GAPDH 3		1127228	1205575	1141655	1247626			GAPDH 3		1127228	1205575	1141655	1247626
NF-кB p65 1/GAPDH 1		0.209587	0.0940174	0.716638	0.378832			IKKα 1/ GAPDH 1		0.944065	0.439326	0.134785	0.727647
NF-кB p65 2/GAPDH2		0.213109	0.0984913	0.730998	0.385349			IKKα 2 /GAPDH 2		0.868011	0.427624	0.130117	0.715387
NF-кB p65 3/GAPDH 3		0.214672	0.0974033	0.729463	0.387484			IKKα 3 /GAPDH 3		0.90759	0.437177	0.132765	0.726202
		1	0.448585	3.41929	1.80752					1	0.465355	0.142771	0.770759
		1	0.462163	3.43016	1.80822					1	0.492648	0.149902	0.824167
		1	0.453731	3.39804	1.80501					1	0.48169	0.146283	0.800144
